# Supplementary material
Source: PubMed Central journal article supplement (PMC2736342)
Supplement: NIHMS96946-supplement-1_si_001.pdf [file NIHMS96946-supplement-1_si_001.pdf]

# **Helix dipole movement and conformational variability contribute to allosteric GDP release in $G\alpha_i$ subunits**

## **Supplementary Information**

*Anita M. Preininger<sup>1#</sup>, Michael A. Funk<sup>1#</sup>, Scott M. Meier<sup>1</sup>, William M. Oldham<sup>1</sup>, Christopher A. Johnston<sup>2,†</sup>, Suraj Adhikary<sup>3</sup>, Adam J. Kimple<sup>2</sup>, David P. Siderovski<sup>2</sup>, Heidi E. Hamm<sup>1,\*</sup>, and Tina M. Iverson<sup>1,4,\*</sup>*

<sup>1</sup>Departments of Pharmacology, <sup>3</sup>Biological Sciences and <sup>4</sup>Biochemistry, Vanderbilt University Medical Center, Nashville, TN 37232-6600 and <sup>2</sup>Department of Pharmacology, University of North Carolina School of Medicine, Chapel Hill, North Carolina 27599-7365

#These authors contributed equally to this work.

† Present address: Institute of Molecular Biology, University of Oregon, Eugene, OR, 97403

\*Correspondence should be addressed to HEH: fax, (615) 343-1084; phone, (615) 343-3533; email, heidi.hamm@vanderbilt.edu or TMI: fax, (615) 343-6532; phone, (615) 322-7817; email, tina.iverson@vanderbilt.edu

## SUPPLEMENTARY FIGURE 1

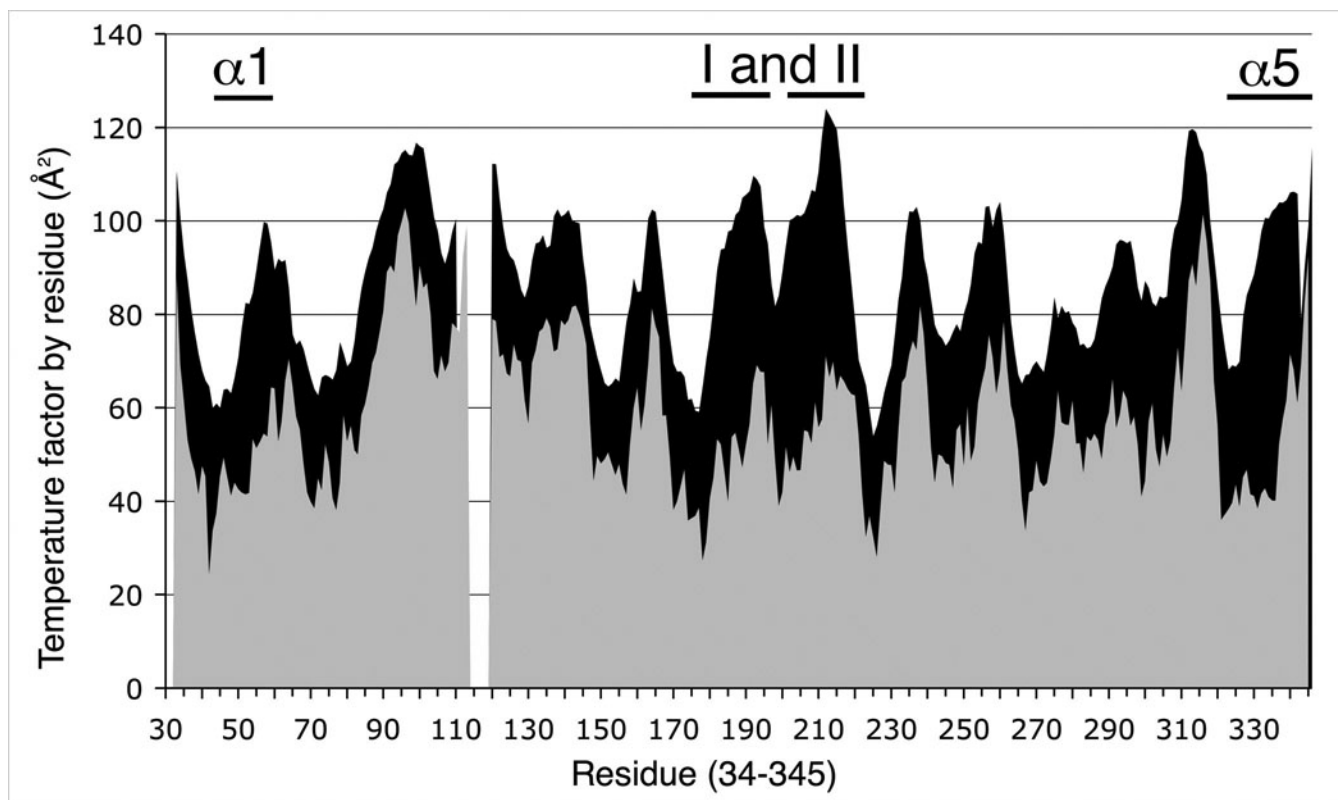

**Supplementary Fig. 1** Temperature factor analysis by residue. Crystallographic temperature-factor values for the I56C/Q333C  $G\alpha_{i1}$  are shown in *black* (average 87.8 Å<sup>2</sup>), while temperature-factor values for the wild type crystallized in the same space group are shown in *light grey* (average 57.3 Å<sup>2</sup>). Sequence positions for the  $\alpha 1$  helix ( $\alpha 1$ ), switch I and switch II (I and II), and the  $\alpha 5$  helix ( $\alpha 5$ ) are marked. Residues 111-119 are not observed in the crystallographic electron density. As a result, the temperature factors cannot be compared in this region.

SUPPLEMENTARY FIGURE 2

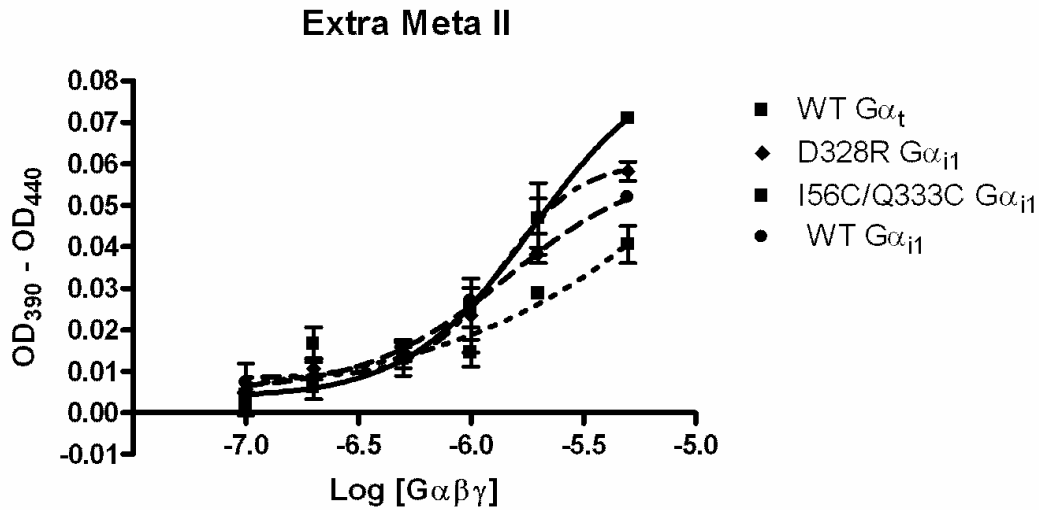

**Supplementary Fig. 2**

Urea-washed dark-adapted ROS membranes (5  $\mu$ M) were incubated on ice for 5 minutes with indicated concentrations of G $\alpha$  proteins (in complex with G $\beta_1\gamma_1$ ). Absorbance of each ROS-G $\alpha\beta\gamma$  combination was scanned from 350 to 650 nm using a DW2000 Spectrophotometer (Olis) in 50mM HEPES, 0.1M NaCl, 1mM MgCl<sub>2</sub>, 1mM DTT, pH 8.0 both before and after light activation, and extra meta II was calculated as the difference between Abs<sub>390</sub> (light - dark) less Abs<sub>440</sub> (light - dark).

SUPPLEMENTARY FIGURE 3

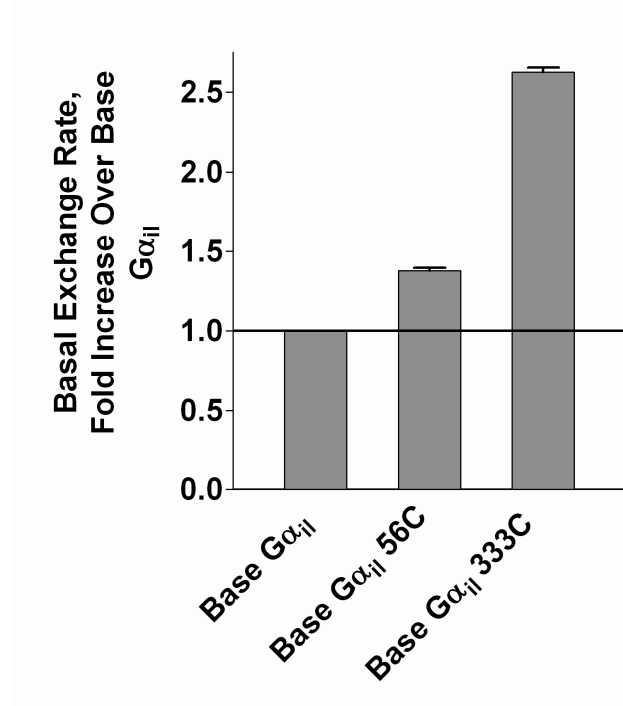

**Supplementary figure 3:** Basal intrinsic nucleotide release was determined as described in materials and methods for G $\alpha_{i1}$  subunits (*I*) with individual cysteine mutations at the indicated residues. The I56C/Q333C G $\alpha_{i1}$  has a 6.2-fold enhancement of basal nucleotide exchange over wild-type.

**During the review process, all Supplementary movies can be downloaded from:**

<http://structbio.vanderbilt.edu/~tina/Galpha>

Or <http://structbio.vanderbilt.edu/~tina/movies.tar.gz>

**Supplementary Movie 1.** Roto-translation of the  $\alpha 5$  helix is associated with global changes in the I56C/Q333C  $G\alpha_{i1}$  subunit. The  $\alpha 5$  helix (*yellow*) roto-translates from the position that it adopts in the GDP- $AlF_4^-$ -bound wild-type  $G\alpha_{i1}$  subunit structure (2) (PDBID 1GFI) into the position that is observed in the I56C/Q333C  $G\alpha_{i1}$  subunit structure and the movie pauses briefly. Following the pause, the other secondary structural elements are moved into the position observed in the I56C/Q333C  $G\alpha_{i1}$  subunit structure. Coloring is similar to that in Figure 1 with the  $\alpha 1$  helix is shown in *orange*, and the GTPase-helical domain linker in *light blue*, and the GDP- $AlF_4^-$  molecule is shown as a *red* space filling model. The exact order of structural changes is not known.

**Supplementary Movie 2.** Modeling of a continuous movement of the main chain elements at the back door egress pathway from the nucleotide pocket from the positions observed in a resting state to positions observed in rapidly-exchanging  $G\alpha_{i1}$  subunits. Switch II is shown in *bright green*, the  $\beta 2$  and  $\beta 3$  strands are in *dark green*, the  $\alpha 1$  helix is in *orange*, switch III is in *purple*, and the GDP- $AlF_4^-$  molecule is shown as a *red* space filling model. Some of the residues of the switch II region were not observed in the density of the KB-752 peptide-bound structure. The movie begins with these structural elements in the positions that they adopt in the GDP- $AlF_4^-$ -

bound wild-type  $G\alpha_{i1}$  subunit structure (2) (PDB-ID 1GFI). These elements then morph into the positions observed in the I56C/Q333C  $G\alpha_{i1}$  structure, and the movie pauses briefly. Following the pause, each of these structural elements morphs once again into the positions observed in the GDP-SO<sub>4</sub><sup>2-</sup>-bound  $G\alpha_{i1}$  subunit in complex with peptides KB-752 peptide and D2N (3) (PDB-ID 2HLB).

**Supplementary Movie 3.** Close-up view of the structural rearrangements of the back door egress pathway shows potentially altered bonds to the  $\gamma$ -phosphate of the guanine nucleotide. The protein is shown in *blue*, the GDP-AlF<sub>4</sub><sup>-</sup> molecule is shown with the nucleotide base and the two phosphates as a *red* space filling model and the AlF<sub>4</sub><sup>-</sup> shown as a *blue* space filling model. The P-loop and  $\gamma$ -phosphate binding side chains from the positions observed in the GDP-AlF<sub>4</sub><sup>-</sup>-bound wild-type  $G\alpha_{i1}$  subunit structure (2) (PDB-ID 1GFI) into the positions observed in the I56C/Q333C  $G\alpha_{i1}$  subunit structure showing a slight opening of the back door.

1. Oldham, W.M., N. Van Eps, A.M. Preininger, W.L. Hubbell, and H.E. Hamm (2006). Mechanism of the receptor-catalyzed activation of heterotrimeric G proteins, *Nature Structural and Molecular Biology*. 13, 772-777.
2. Coleman, D.E., A.M. Berghuis, E. Lee, M.E. Linder, A.G. Gilman, and S.R. Sprang (1994). Structures of Active Conformations of  $G_{i\alpha 1}$  and the Mechanism of GTP Hydrolysis, *Science*. 265, 1405-1412.
3. Johnston, C.A. and D.P. Siderovski (2007). Structural basis for nucleotide exchange on G alpha i subunits and receptor coupling specificity, *Proc Natl Acad Sci U S A*. 104, 2001-2006.
